# Supplementary material
Source: PubMed Central journal article supplement (PMC2768919)
Supplement: tpc.109.068890_1.pdf [file tpc.109.068890_1.pdf]

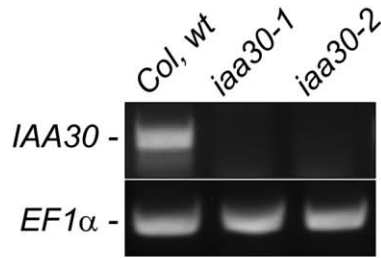

**Supplemental Figure 1:** Confirmation of knockout alleles of *IAA30*.

RNA was extracted from 21 day old SAM SE tissue of Col, wt and *iaa30-1* (SALK\_065384) and *iaa30-2* (JIC SM line, ABRC stock CS112165), and RT-PCR performed to confirm lack of transcript accumulation in the *iaa30* knockout alleles using 37 cycles of PCR. *EF1α* served as a control (27 cycles of PCR).

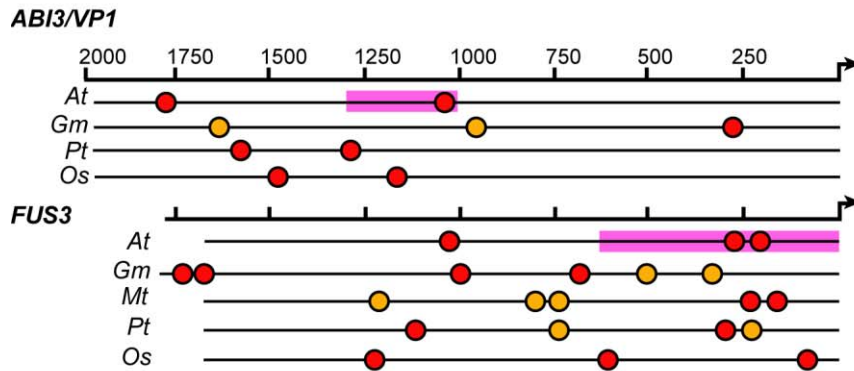

**Supplemental Figure 2:** Conservation of CArG motifs within the regulatory regions of genes with homology to Arabidopsis (*At*) *ABI3* and *FUS3*.

Regulatory regions 5' of the start codon for Arabidopsis *ABI3* and *FUS3* (*At*) and genes encoding homologous proteins from *Glycine max* (*Gm*), *Populus trichocarpa* (*Pt*), *Oryza sativa* (*Os*), and *Medicago truncatula* (*Mt*) showing potential conserved cis elements recognized by MADS-domain proteins (red circle, perfect CC[A/T]<sub>6</sub>GG, C[A/T]<sub>8</sub>G or C[A/T]<sub>7</sub>G; orange circle, near perfect). Pink indicates regions bound by AGL15 in Arabidopsis as identified by ChIP-chip.

**Supplemental Table 1.** Presence of previously known AGL15 targets and controls as bound in ChIP-chip. NP, not present.

| AGI                                                                     | Description                    | Reps. Partek | Reference               |
|-------------------------------------------------------------------------|--------------------------------|--------------|-------------------------|
| <b>Previously identified targets expected on the array and present:</b> |                                |              |                         |
| At5g13790                                                               | <i>AGL15</i>                   | 3/3          | Zhu and Perry, 2005     |
| At1g02400                                                               | <i>DTA1/GA2ox6</i>             | 2/3          | Wang et al. 2002, 2004  |
| At2g45830                                                               | <i>DTA2</i>                    | 3/3          | Wang et al., 2002       |
| At4g34000                                                               | <i>ABF3</i>                    | 3/3          | Unpublished             |
| At4g25470                                                               | <i>CBF2/DREB1c</i>             | 3/3          | Hill et al., 2008       |
| At2g21060                                                               | <i>CSP4/GRP2b</i>              | 3/3          | Nakaminami et al., 2009 |
| At3g57390                                                               | <i>AGL18</i>                   | 3/3          | Hill et al., 2008       |
| At1g52690                                                               | <i>LEA76</i>                   | 2/3          | Hill et al., 2008       |
| <b>Previously used control regions not bound by AGL15:</b>              |                                |              |                         |
| At3g18780                                                               | <i>ACT2</i>                    | NP           | Unpublished             |
| At1g07920                                                               | <i>EF1-<math>\alpha</math></i> | NP           | Hill et al., 2008       |
| At5g62690                                                               | <i>TUB2</i>                    | NP           | Wang et al., 2002       |
| At3g62250                                                               | <i>UBQ5</i>                    | NP           | Wang et al., 2002, 2004 |
| At2g47110                                                               | <i>UBQ6</i>                    | NP           | Wang et al., 2002,2004  |
| At1g21970                                                               | <i>LEC1</i>                    | NP           | Unpublished             |
| At3g26460                                                               | <i>Major latex ptn-related</i> | NP           | Unpublished             |
| At5g62700                                                               | <i>TUB3</i>                    | 2/3          | Wang et al., 2002       |

**Supplemental Table 2.** DNA fragments identified as being bound by AGL15 using ChIP-chip and verified by enrichment tests.

| AGI       | Description    | C-some: Region bound (size in bp) | Location relative to gene     | Reps. Partek |
|-----------|----------------|-----------------------------------|-------------------------------|--------------|
| At1g28300 | <i>LEC2</i>    | 1: 9897322-9897548 (226)          | Exon/intron                   | 2/3          |
| At3g26790 | <i>FUS3</i>    | 3: 9856994-9857647 (653)          | 5' intergenic/UTR             | 3/3          |
| At3g24650 | <i>ABI3</i>    | 3: 8996533-8996830 (297)          | 5' intergenic                 | 3/3          |
|           |                | 3: 9000395-9001006 (611)          | 3' gene/UTR/intergenic        | 3/3          |
| At1g13260 | <i>RAV1</i>    | 1: 4541398 -4542500 (1102)        | 5' intergenic/UTR/exon        | 3/3          |
| At1g68840 | <i>RAV2</i>    | 1: 25883619-25884235 (616)        | 5' intergenic/UTR/exon        | 3/3          |
| At5g10140 | <i>FLC</i>     | 5: 3173753-3173896 (143)          | Intron/exon                   | 2/3          |
| At2g22540 | <i>SVP</i>     | 2: 9586688-9587629 (941)          | 5' intergenic/UTR/exon        | 3/3          |
| At1g14920 | <i>GAI</i>     | 1: 5151231-5151882 (651)          | 3' UTR/intergenic             | 3/3          |
| At1g30040 | <i>GA2ox2</i>  | 1: 10537210-10537779 (569)        | 5' intergenic/UTR/exon        | 3/3          |
| At2g20180 | <i>PIF1</i>    | 2: 8713675-8714107 (432)          | 5' intergenic                 | 3/3          |
| At3g62100 | <i>IAA30</i>   | 3: 23006436-23006595 (159)        | 5' intergenic                 | 2/3          |
| At5g61590 | <i>ERF</i>     | 5: 24782339-24782661 (322)        | 5' intergenic/UTR/exon        | 3/3          |
| At5g27320 | <i>AtGID1c</i> | 5: 9628908-9629696 (788)          | 5' intergenic/UTR/exon/intron | 3/3          |
| At4g38680 | <i>GRP2</i>    | 4: 18072971-18073428 (457)        | 5' intergenic/UTR             | 3/3          |

**Supplemental Table 3: Oligonucleotides used to confirm binding by AGL15 and response to AGL15.**

| AGI                                            | Gene name                     | Forward                               | Reverse                            |
|------------------------------------------------|-------------------------------|---------------------------------------|------------------------------------|
| <b>For multiplex enrichment tests for ChIP</b> |                               |                                       |                                    |
| At5g62690/<br>At5g62700                        | <i>TUB2 /<br/>TUB3</i>        | CAC AAA GGA AGT TGA CGA GCA G         | CGC CTG AAC ATC TCT TGG ATT G      |
| At1g07920/<br>At1g07930/<br>At1g07940          | <i>EF1<math>\alpha</math></i> | GTA CAA GGG ACC AAC TCT CCT T         | GCA AAG GTC ACA ACC ATA CCA G      |
| At2g47110/<br>At3g62250                        | <i>UBQ 5, UBQ6</i>            | GGT GCT AAG AAG AGG AAG AAG           | CTC CTT CTT TCT GGT AAA CGT        |
| At5g13790                                      | <i>AGL15</i>                  | GGA AGA AAA GGG GTA GGA CC            | GAG AGA AGA AGG TAG AAG GAA GA     |
| At4g25470                                      | <i>CBF2</i>                   | TGC AAG TAT TTT TAG AGC AGT AAC       | CAA TAA AAT ATC TTC ACA ACG AAC    |
| At1g28300                                      | <i>LEC2</i>                   | GAA CAA GCG ATC ACA CAC AGA C         | CGA GGA CGA AAG CAA GAA TCT C      |
| At3g26790                                      | <i>FUS3</i>                   | GTT GTG CAG ATC GAA ACA GAG G         | GAG AGA GAA GAA GAC GCC ATT G      |
| At2g20180                                      | <i>PIF1/PIL5</i>              | GAG GTT GGT ACT GGA TAG GCT T         | CCG TCA GCT ACA AAT GAT CTC AG     |
| At5g27320                                      | <i>GID1c</i>                  | TCC CTT CTC GGC TCA AAT CTT C         | TCA GTC ACA AGG GTC AGA GA         |
| At1g68840                                      | <i>RAV2</i>                   | CTC GTC CAT TCC TCA CAT CAT C         | GAA GAT GGT AGC TTT CGT GAC TCC    |
| At1g61590                                      | <i>ERF</i>                    | AAG GGT TCT AGA GAC CAG AGT C         | CCC ACA GAG TTA AAC CAG AGA GAC    |
| At5g10140                                      | <i>FLC</i>                    | ATA CAA ACG CTC GCC CTT ATC AGC       | AGT GGC TCA GTT CCA ACT CCA AGT    |
| At3g24650                                      | <i>ABI3, 5'</i>               | GTC TGC CTC TTC CAC TTC AAT AG        | GTT CCT CGA GAG AAA GAC ATT GG     |
| At3g24650                                      | <i>ABI3, 3'</i>               | TGG GCT CCA AGA AGG TGA TTT C         | TGA AGC GAC CAC CAC ATT            |
| At1g13260                                      | <i>RAV1</i>                   | CAC GTG GAC CCT TTA TCC ATT C         | GGA AGT AAG ATG GGT GTG TAT GGG    |
| At2g22540                                      | <i>SVP</i>                    | CTT CTT CTC TCC TCG ACC TTT GAG       | AGA GAG AGA GAG TGA CAA GAC GAC    |
| At1g14920                                      | <i>GAI</i>                    | GCA TGG TAT TAT AGG TGG ACC AG        | GTC TAC TAC CAC CAC TGT CGA ATG    |
| At1g30040                                      | <i>GA2ox2</i>                 | GCT GTA TTT CCA TGT GTG CG            | TCT AAA GTG ACT GGC TGT GG         |
| At4g38680                                      | <i>GRP2</i>                   | CTT ATC ACA TGC TGG CCC AT            | CTC TGA AAT CTC TCT CTC CTC GCA    |
| <b>For qRT-PCR</b>                             |                               |                                       |                                    |
| At5g19770                                      | <i>TUA3</i>                   | AGG GCT TAC CAC GAG CAG CTA TCA       | ACA GGC CAT GTA CTT TCC GTG TCT    |
| At1g30040                                      | <i>AtGA2ox2</i>               | TAT TGG CTT CTT CGG CTT GCC T         | TCC AAC CAA CGT CAC CGT TT         |
| At3g26790                                      | <i>FUS3</i>                   | TCA TCA TGG GTT ATC GGC GT            | AGT TGG CAC GTG GGA AAT AGG A      |
| At2g45470                                      | <i>FLA8</i>                   | ACC GTG AGT AGC CAC AAC ATC A         | TGC GCC ATT GTT AAG GAC GA         |
| At1g28300                                      | <i>LEC2</i>                   | ATC CTC AGA TCC CGG TTA CGC AAA       | ACC ACC TCT CTC TTG CCA CAA ACA    |
| At1g24260                                      | <i>AGL9</i>                   | TTC GAG CAT GCT TCG GAC ACT           | AGG CCT CTC TTG AAG GCA CAT T      |
| At1g68840                                      | <i>RAV2</i>                   | AAG GTG TTG TTC CTC AGC CT            | ACA AGC TGC GAT GTC GTA GGA A      |
| At3g62100                                      | <i>IAA30</i>                  | ATA CTC GGA ACC TAA GCA CGG A         | ATC ATC ATT TCC TCT GCC GCA C      |
| At5g61590                                      | <i>ERF</i>                    | AAC GTC ACC TGA GGT TGA GAC TGT       | TCC TGG ATC CTT TCT TTG CCG GAT    |
| At5g10140                                      | <i>FLC</i>                    | TCG GAG AGA AGC CAT GGG AAG AAA       | TTG CGA CGT TTG GAG AAG GT         |
| At3g24650                                      | <i>ABI3</i>                   | ACT GTG ACG ACT CTT CTG GTG CAT       | ATC AAT GCA ATC ACC ACC GCC TTC    |
| <b>For qPCR for ChIP</b>                       |                               |                                       |                                    |
| At5g19770                                      | <i>TUA3</i>                   | AGG GCT TAC CAC GAG CAG CTA TCA       | ACA GGC CAT GTA CTT TCC GTG TCT    |
| At3g24650                                      | <i>ABI3 5'</i>                | ACC GCT TGG TCT CAC CAC TCA AAT       | AAA TAG AAG TCT CCT CGT GCC GCT    |
| At3g24650                                      | <i>ABI3, 3'</i>               | GGG TTA AAG TAA GAC AAC CGA GCG<br>GA | TTG AGA AGT TGG TGA AGC GAC CAC    |
| At1g28300                                      | <i>LEC2</i>                   | AGT GGT TCC TTT CCC TCG ACT CAT       | GTG TCT GTG TGT GAT CGC TTG TTC    |
| At3g26790                                      | <i>FUS3</i>                   | AGA ACC AAG AGC AAA GGG ACG AGT       | TGG TAG AGA GAG AGA AGA AGA CGC CA |
| At3g62100                                      | <i>IAA30</i>                  | CGA AAG GTA GTA CTA GGA GTC GAG       | GCA GAC AAA TAC ACG TGT CAT GCA G  |
| At3g18780                                      | <i>ACT2</i>                   | AAG CTG TTC TCT CCT TGT ACG CCA       | ACA GTG TGA GAC ACA CCA TCA CCA    |
| At1g21970                                      | <i>LEC1</i>                   | GGG CCG TGA AAC CCA ATA CCA TTT       | ACC GAT CGT GGT TCT GCA CTT AGA    |
